# Supplementary material for: Effects of Citalopram on Neuropsychiatric Symptoms in Alzheimer’s Dementia: Evidence From the CitAD Study
Source: Atypon-hosted journal article supplement (doi:10.1176/appi.ajp.2016.15020248), 2016-04-01
Supplement: appi.ajp.2016.15020248.ds001.pdf [file appi.ajp.2016.15020248.ds001.pdf]

 


Psychiatry Online
