# Supplementary material for: Effects of Citalopram on Neuropsychiatric Symptoms in Alzheimer’s Dementia: Evidence From the CitAD Study
Source: Atypon-hosted journal article supplement (doi:10.1176/appi.ajp.2016.15020248), 2016-04-01
Supplement: appi.ajp.2016.15020248.ds001.pdf [file appi.ajp.2016.15020248.ds001.pdf]

**TABLE S1.** Neuropsychiatric Inventory (NPI) Scores at Week 9<sup>^</sup>

| Individual NPI Domain             | All Participants*    |                   |                          |         |
|-----------------------------------|----------------------|-------------------|--------------------------|---------|
|                                   | Citalopram<br>(n=86) | Placebo<br>(n=83) | OR (95% CI) <sup>1</sup> | P-value |
|                                   | n, %                 | n, %              |                          |         |
| Delusions                         | 22 (26)              | 35 (42)           | 0.45 (0.22-0.95)         | 0.04    |
| Hallucinations                    | 11 (13)              | 13 (16)           | 1.09 (0.42-2.81)         | 0.87    |
| Agitation/Aggression <sup>1</sup> | 66 (77)              | 70 (84)           | 0.63 (0.28-1.40)         | 0.26    |
| Depression / Dysphoria            | 24 (28)              | 30 (36)           | 0.67 (0.35-1.30)         | 0.24    |
| Anxiety                           | 36 (42)              | 54 (65)           | 0.44 (0.23-0.84)         | 0.01    |
| Elation / Euphoria                | 3 (3)                | 5 (6)             | 0.46 (0.11-1.91)         | 0.28    |
| Apathy / Indifference             | 41 (48)              | 42 (51)           | 0.93 (0.49-1.78)         | 0.83    |
| Disinhibition                     | 27 (31)              | 34 (41)           | 0.72 (0.37-1.42)         | 0.34    |
| Irritability / Lability           | 49 (57)              | 61 (73)           | 0.41 (0.21-0.8)          | 0.01    |
| Aberrant Motor Behavior           | 34 (40)              | 47 (57)           | 0.41 (0.21-0.8)          | 0.01    |
| Sleep / Nighttime Behavior        | 21 (24)              | 30 (36)           | 0.62 (0.31-1.23)         | 0.17    |
| Appetite / Eating Disorders       | 22 (26)              | 18 (22)           | 1.23 (0.62-2.43)         | 0.56    |

<sup>^</sup>All missing data for all study visits were imputed using the method of multiple imputation, \*Number (%) with domain or summary score >0 at week 9. Including all randomized participants with week 9 data (86 in citalopram and 83 in placebo); 1. The odds ratio is calculated using GEE including all follow-up visits with a logistic link and first order autoregressive covariance structure. The estimate shown is for the odds of reporting the symptoms at week 9 for citalopram vs. placebo controlling for baseline symptom score and MMSE. A number less than one favors citalopram; CI = confidence interval; NPI = neuropsychiatric inventory

**FIGURE S1. Participant flow, CONSORT diagram**

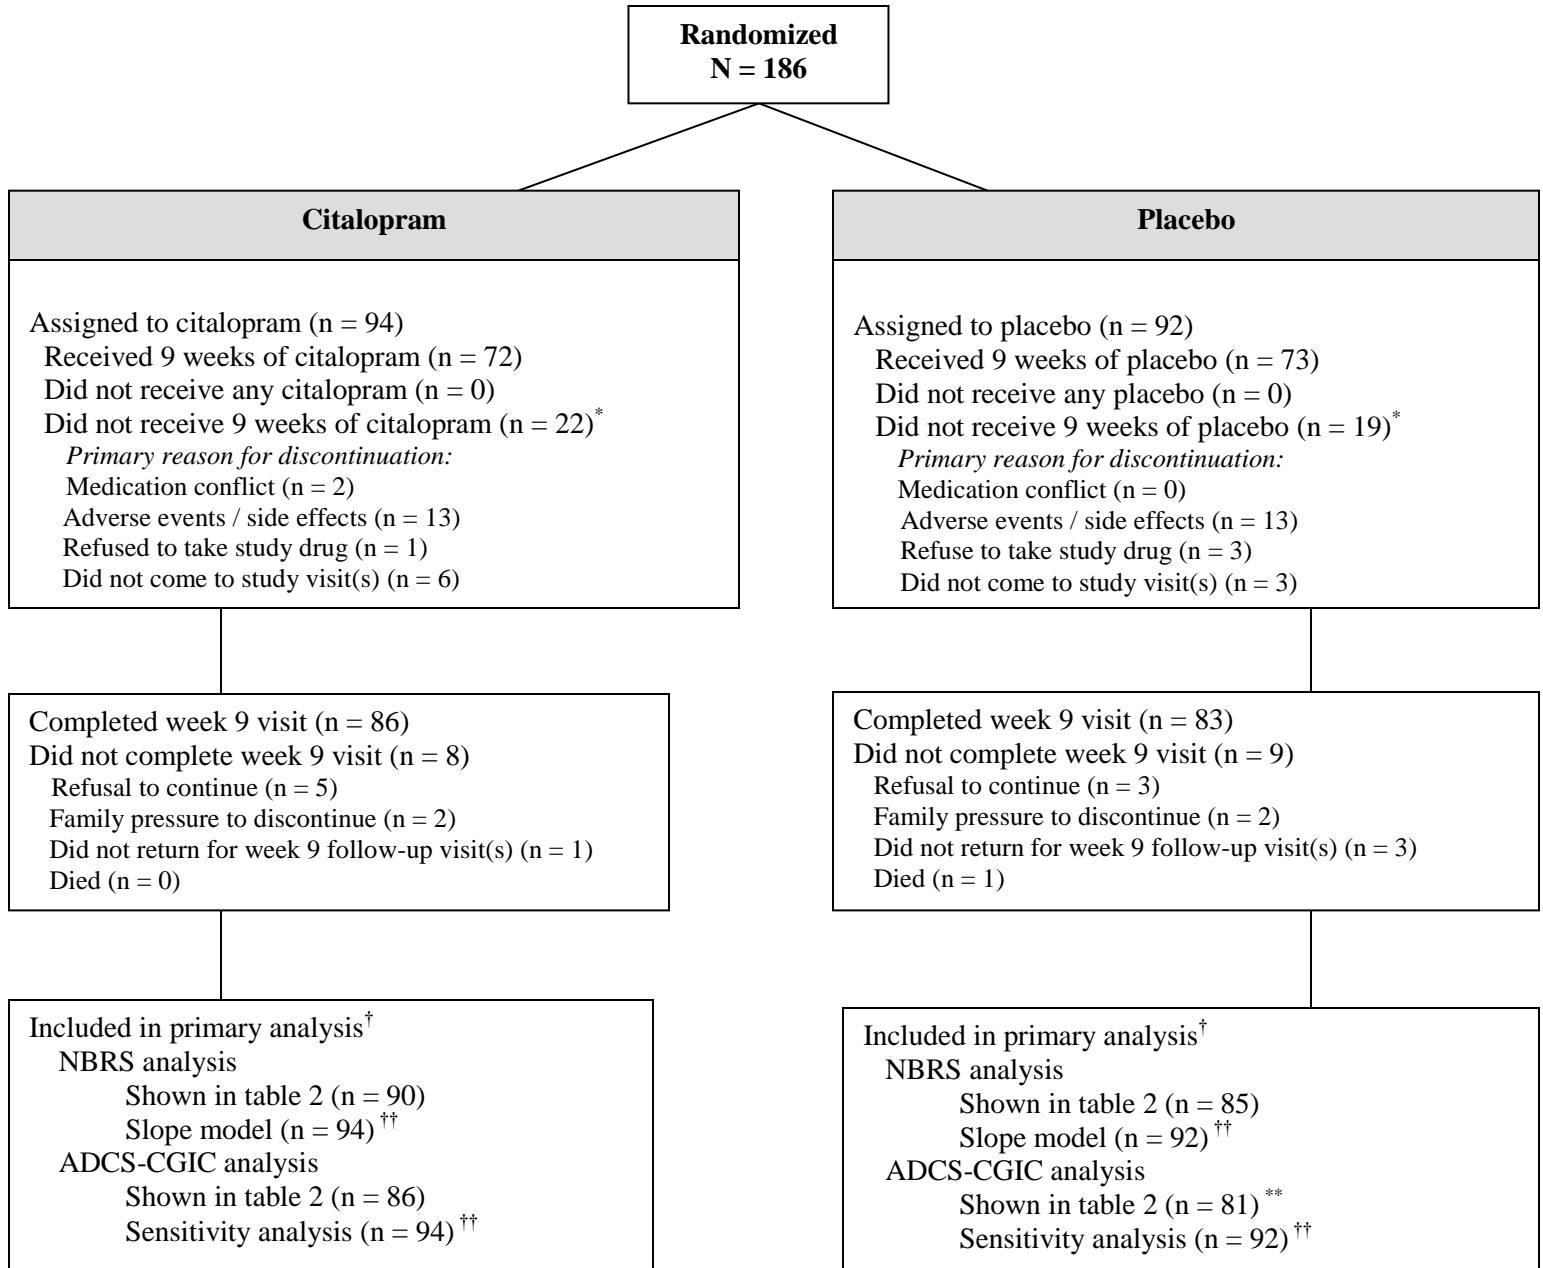

\*Available data from participants were included in the analysis in the originally assigned treatment group regardless of treatment adherence.

†The primary outcomes were the comparisons of 1) difference in week 9 scores between citalopram and placebo on the Neurobehavioral Rating Scale – agitation subscore calculated using mixed effects regression and 2) ratings on the ADCS – Clinical Global Impression of Change – agitation subscore at week 9 calculated using proportional odds regression.

\*\* Two participants in placebo group had week 9 visit, but the ADCS-CGIC was not administered.

†† NBR slope model included data from all randomized participants. For the ADCS-CGIC sensitivity analyses outcomes were multiply imputed.
